# Supplementary material for: A study on the chain propagation of benzoxazine
Source: Royal Society of Chemistry journal article supplement (doi:10.1039/c5py01397f), 2015-11-20
Supplement: c5py01397f1.pdf [file c5py01397f1.pdf]

Supporting information:

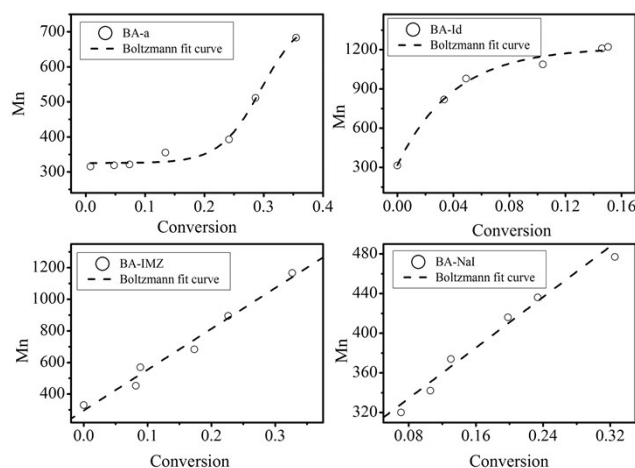

Fig.SI 1 The plots of  $\overline{M}_n$  as a functional of conversion for BA-a, BA-a-Id, BA-a-IMZ and BA-a-Nal

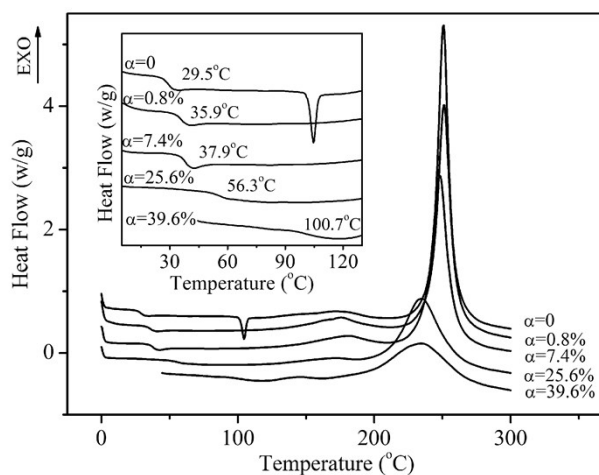

Fig. SI 2 The DSC curves of BA-a at different curing degree

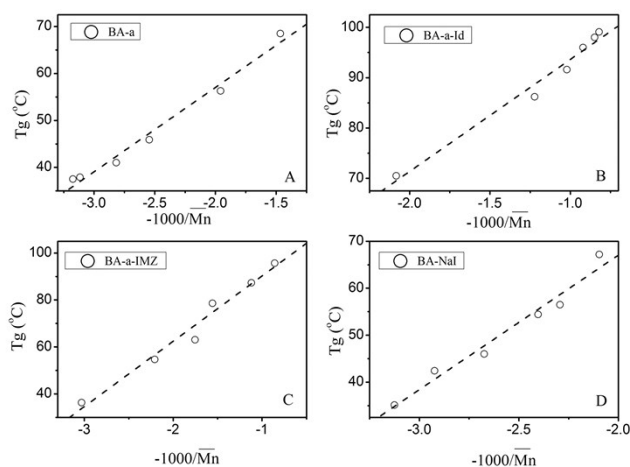

Fig.SI 3 The plots of  $T_g$  as a function of  $-1000/\overline{M}_n$  for BA-a, BA-a-Id, BA-a-IMZ and BA-a-Nal

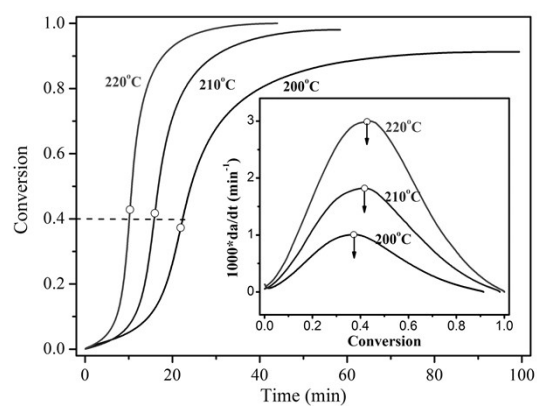

Fig.SI 4 The plots of conversion vs time of BA-a at different temperature obtained by isothermal-DSC. The inset presents the corresponding curves of polymerization rate vs conversion

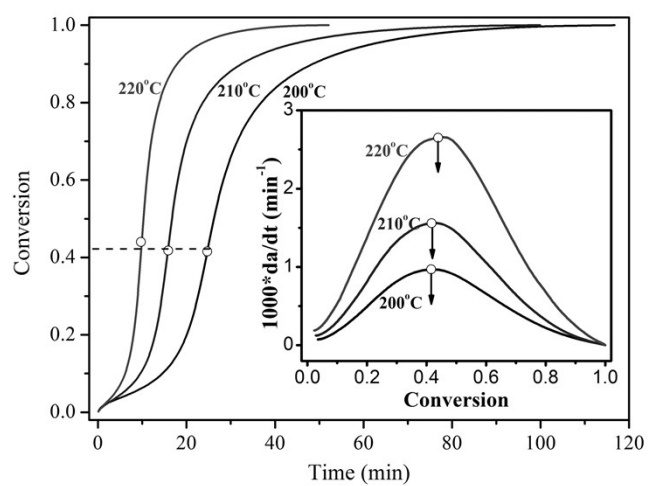

Fig.SI 5 The plots of conversion vs time of BA-a-tAm at different temperature obtained by isothermal-DSC. The inset presents the corresponding curves of polymerization rate vs conversion

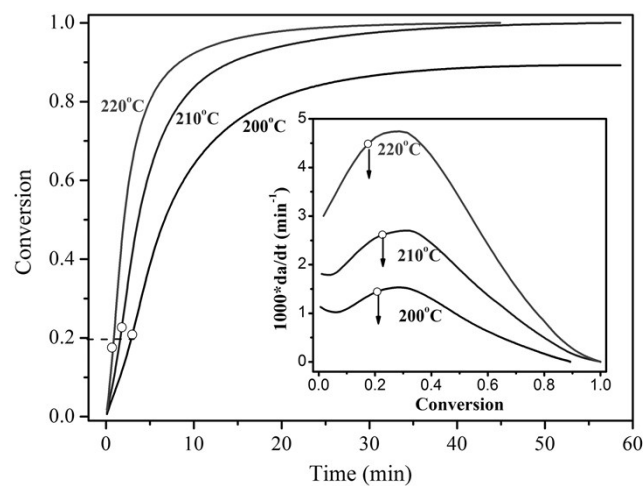

Fig.SI 6 The plots of conversion vs time of BA-a-Id at different temperature obtained by isothermal-DSC. The inset presents the corresponding curves of polymerization rate vs conversion

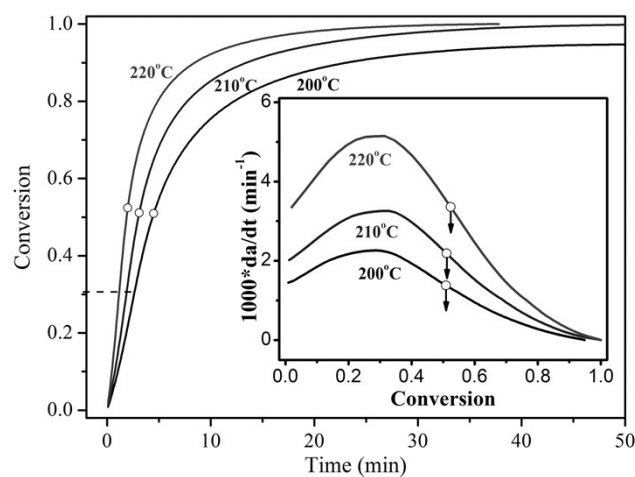

Fig.SI 7 The plots of conversion vs time of BA-a-Nal at different temperature obtained by isothermal-DSC. The inset presents the corresponding curves of polymerization rate vs conversion

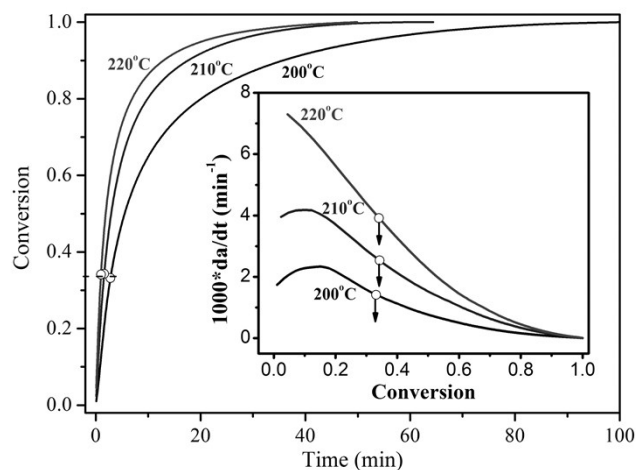

Fig.SI 8 The plots of conversion vs time of BA-a-IMZ at different temperature obtained by isothermal-DSC. The inset presents the corresponding curves of polymerization rate vs conversion

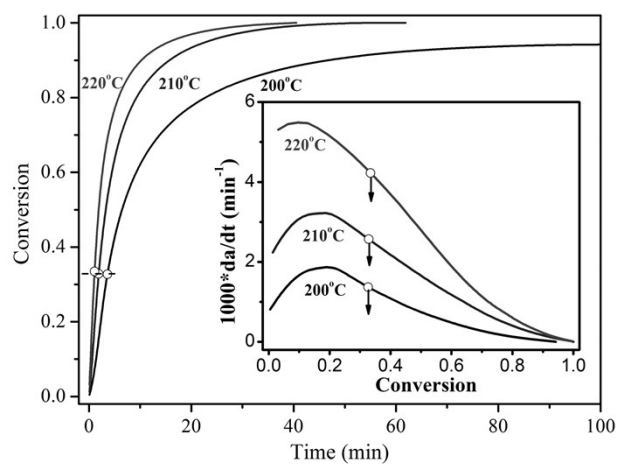

Fig.SI 9 The plots of conversion vs time of BA-a-12MZ at different temperature obtained by isothermal-DSC. The inset presents the corresponding curves of polymerization rate vs conversion

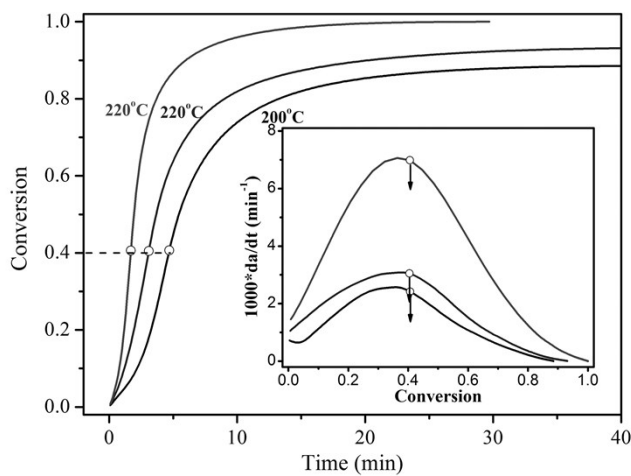

Fig.SI 10 The plots of conversion vs time of BA-a-tBp at different temperature obtained by isothermal-DSC. The inset presents the corresponding curves of polymerization rate vs conversion

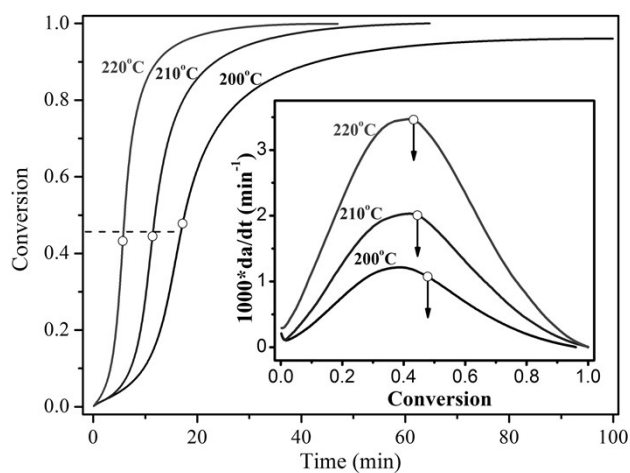

Fig.SI 11 The plots of conversion vs time of BA-a-HA at different temperature obtained by isothermal-DSC. The inset presents the corresponding curves of polymerization rate vs conversion

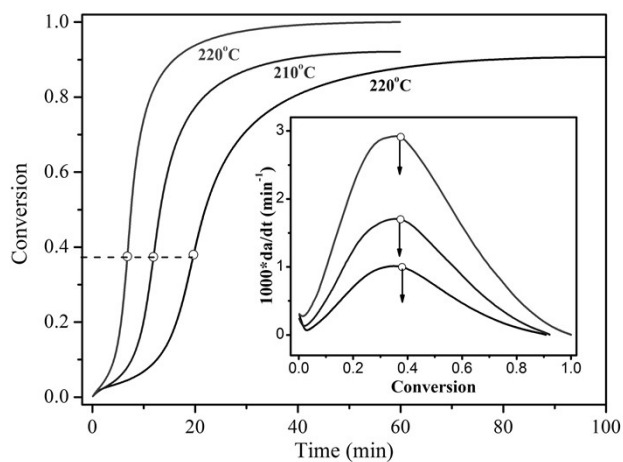

Fig.SI 12 The plots of conversion vs time of BA-a-pCa at different temperature obtained by isothermal-DSC. The inset presents the corresponding curves of polymerization rate vs conversion

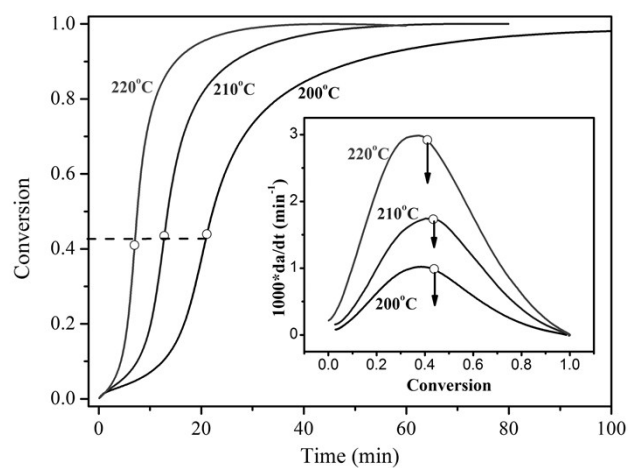

Fig.SI 13 The plots of conversion vs time of BA-a-sAm at different temperature obtained by isothermal-DSC. The inset presents the corresponding curves of polymerization rate vs conversion
